# Supplementary material for: A Dynamic Model for Strategies and Dynamics of Plant Water-Potential Regulation Under Drought Conditions
Source: Front Plant Sci. 2020 Apr 28;11:373. doi: 10.3389/fpls.2020.00373 (PMC7199548; doi:10.3389/fpls.2020.00373)
Supplement: Supplementary file 3 [file Table_1.XLSX]

## Sheet: Sheet1
Species	Source	Lambda	Std err lambda	DeltaPsiMax	Std err DeltaPsiMax	Group
Acer saccharum	Loewenstein1998	-0.3	0.2	1.03	0.1	A
Annona squamosa	Endres2007-drought	-0.07	0.14	0.75	0.11	A
Arbutus unedo	Martinez-Vilalta_2003-control	0.6	0.05	2.06	0.08	C
Arbutus unedo	Martinez-Vilalta_2003-drought	0.4	0.05	1.85	0.12	B
Arbutus unedo	Werner1999	0.27	0.2	1.13	0.28	B
Artemisia filifolia	Lin1996	0.42	0.08	2.06	0.09	C
Atriplex canescens	Lin1996	0.15	0.3	2.14	0.56	C
Carpinus viminea	Singh2006	0.07	0.29	0.89	2.02	A
Ceanothus crassifolius	Pratt2008-shade	0.1	0.1	0.71	0.2	A
Ceanothus crassifolius	Pratt2008-sun	-0.01	0.05	0.8	0.26	A
Ceanothus leucodermis	Pratt2008-shade	0.08	0.04	0.89	0.11	A
Ceanothus leucodermis	Pratt2008-sun	0.06	0.06	0.94	0.25	A
Ceanothus megacarpus	Pratt2008-shade	0.05	0.09	0.9	0.27	A
Ceanothus megacarpus	Pratt2008-sun	0.14	0.07	1.44	0.4	B
Ceanothus oliganthus	Pratt2008-shade	0.09	0.1	1.13	0.25	B
Ceanothus oliganthus	Pratt2008-sun	0.09	0.09	1.21	0.47	B
Ceanothus spinosus	Pratt2008-shade	0.15	0.06	1.13	0.26	B
Ceanothus spinosus	Pratt2008-sun	0.03	0.1	0.94	0.46	A
Cistus albidus	Werner1999	-0.19	0.2	0.87	0.28	A
Cistus monspeliensis	Werner1999	-0.19	0.2	0.87	0.28	A
Coleogyne ramosissima	Lin1996	0	0.24	1.62	0.86	B
Cupressus torulosa	Singh2006	-0.11	0.38	0.71	1.56	A
Erica arborea	Tognetti2000_co2	0.01	0.08	0.26	0.09	A
Erica arborea	Tognetti2000_control	0.03	0.08	0.33	0.16	A
Fraxinus micrantha	Singh2006	0	0.19	0.36	0.19	A
Haloxylon ammodendron	Xu2008	0.71	0.11	3.35	0.28	C
Juniperus communis	Tognetti2000_co2	-0.13	0.13	0.66	0.14	A
Juniperus communis	Tognetti2000_control	-0.14	0.11	0.75	0.14	A
Juniperus osteosperma	Leffler2002	0.32	0.09	1.38	0.14	B
Justicia californica	Tinoco-Ojanguren2008	0.51	0.09	2.1	0.21	C
Larrea tridentata	Pockman2010	0.87	0.22	4.46	0.67	C
Machilus duthiei	Singh2006	-0.3	0.3	0.43	0.27	A
Myrtus communis	Mendes2001_shade	0.09	0.14	1	0.09	A
Myrtus communis	Mendes2001_sun	-0.3	0.2	1.01	0.18	A
Myrtus communis	Tognetti2000_co2	-0.3	0.14	0.46	0.12	A
Myrtus communis	Tognetti2000_control	-0.2	0.17	0.5	0.17	A
Phillyrea latifolia	Serrano2005	0.1	0.09	1.22	0.33	B
Phillyrea latifolia	Vilata2003	0.07	0.08	1.31	0.21	B
Pinus brutia	Lebourgouis1998_drought	0.27	0.04	0.89	0.07	B
Pinus nigra	Lebourgouis_drought	0.33	0.04	0.94	0.06	B
Pinus ponderosa	Gaylord2007	0.58	0.15	1.22	0.17	B
Pinus ponderosa	Simonin2006_thinned	1.09	0.12	1.97	0.14	C
Pinus ponderosa	Simonin2006_unthinned	0.66	0.11	1.41	0.15	B
Quercus cocciferia	Werner1999	0.22	0.17	0.7	0.22	A
Quercus frainetto	Fotelli2000_drought	0.58	0.16	1.39	0.63	A
Quercus ilex	Fotelli2000_control	0.04	0.31	1.18	0.49	B
Quercus ilex	Serrano2005	0.29	0.12	1.33	0.26	B
Quercus ilex	Tognetti1998	-0.04	0.24	0.44	0.74	A
Quercus ilex	Vilalta2003	0.36	0.09	1.62	0.17	B
Quercus lanata	Singh2006	0.11	0.29	1.44	2.18	B
Quercus leucotrichophora	Singh2006	-0.09	0.34	0.35	1.28	A
Quercus macrolepis	Fotelli2000_control	0.37	0.3	1.86	0.49	C
Quercus macrolepis	Fotelli2000_drought	0.4	0.31	2.73	0.89	B
Quercus petraea	Breda1993_drought	0.07	0.1	1.53	0.11	B
Quercus pubescens	Fotelli2000_drought	0.64	0.48	3.22	0.9	B
Quercus pubescens	Tognetti1998	-0.28	0.16	0.19	0.29	A
Rhamnus californica	Pratt2008-shade	0.21	0.04	1.14	0.09	B
Rhamnus californica	Pratt2008-sun	0.18	0.05	0.97	0.16	B
Rhamnus crocea	Pratt2008-shade	0.13	0.08	1.22	0.17	B
Rhamnus crocea	Pratt2008-sun	0.04	0.03	1.02	0.18	B
Rhamnus ilicifolia	Pratt2008-shade	0.2	0.07	1.23	0.15	B
Rhamnus ilicifolia	Pratt2008-sun	0.06	0.04	1.17	0.2	B
Rhododendron arboreum	Singh2006	-0.04	0.31	0.37	1.2	A
Tamarix ramosissima	Nippert2010	0.91	0.42	2.9	0.56	C
Vanclevea stylosa	Lin1996	0.5	0.15	2.04	0.24	C
Vitis vinifera syrah	Schultz2003_drought	-0.3	0.31	0.61	0.23	A
