# Supplementary material for: A Dynamic Model for Strategies and Dynamics of Plant Water-Potential Regulation Under Drought Conditions
Source: Front Plant Sci. 2020 Apr 28;11:373. doi: 10.3389/fpls.2020.00373 (PMC7199548; doi:10.3389/fpls.2020.00373)
Supplement: Supplementary file 4 [file Table_2.XLSX]

## Sheet: Sheet1
Species
